# Supplementary material
Source: PubMed Central journal article supplement (PMC8241220)
Supplement: bgaa021_suppl_supplementary_data.pdf [file bgaa021_suppl_supplementary_data.pdf]

## Supplemental Data

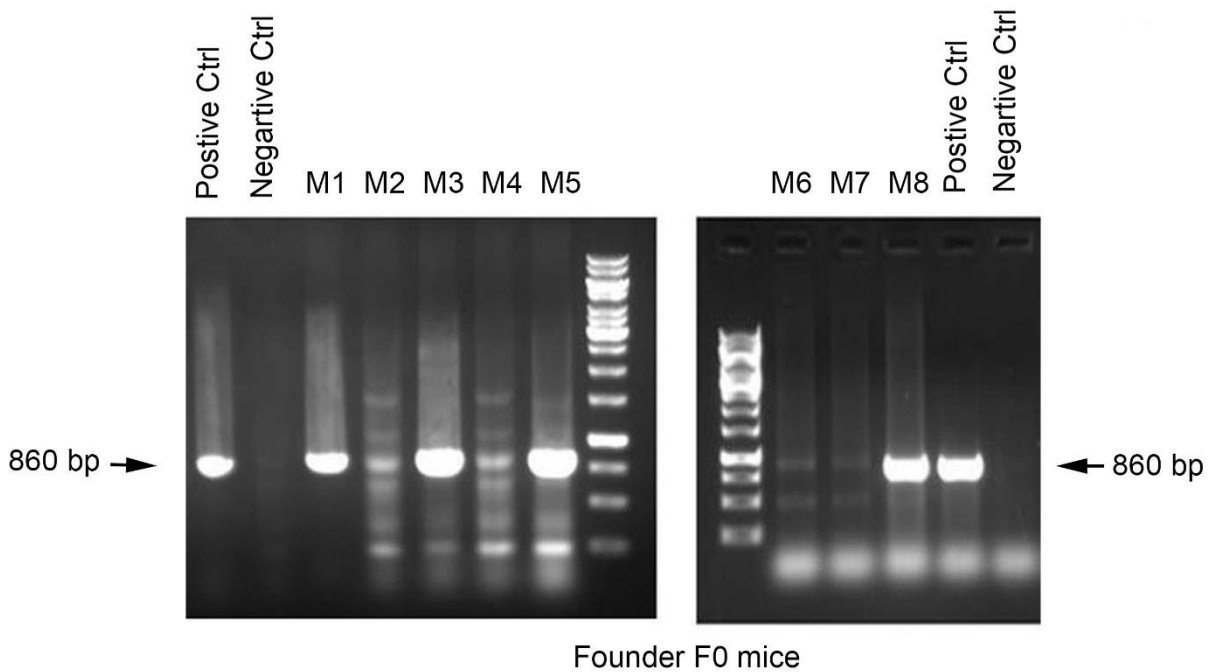

**Supplementary Figure 1.** Identification of founder (F0) Bcl2 transgenic mice. Four positive F0 Bcl2 transgenic mice (M1, M3, M5 and M8) were identified by PCR with tail DNA using a forward mcc10-Bcl2 vector primer and a reverse Bcl2 cDNA primer as described in Methods.

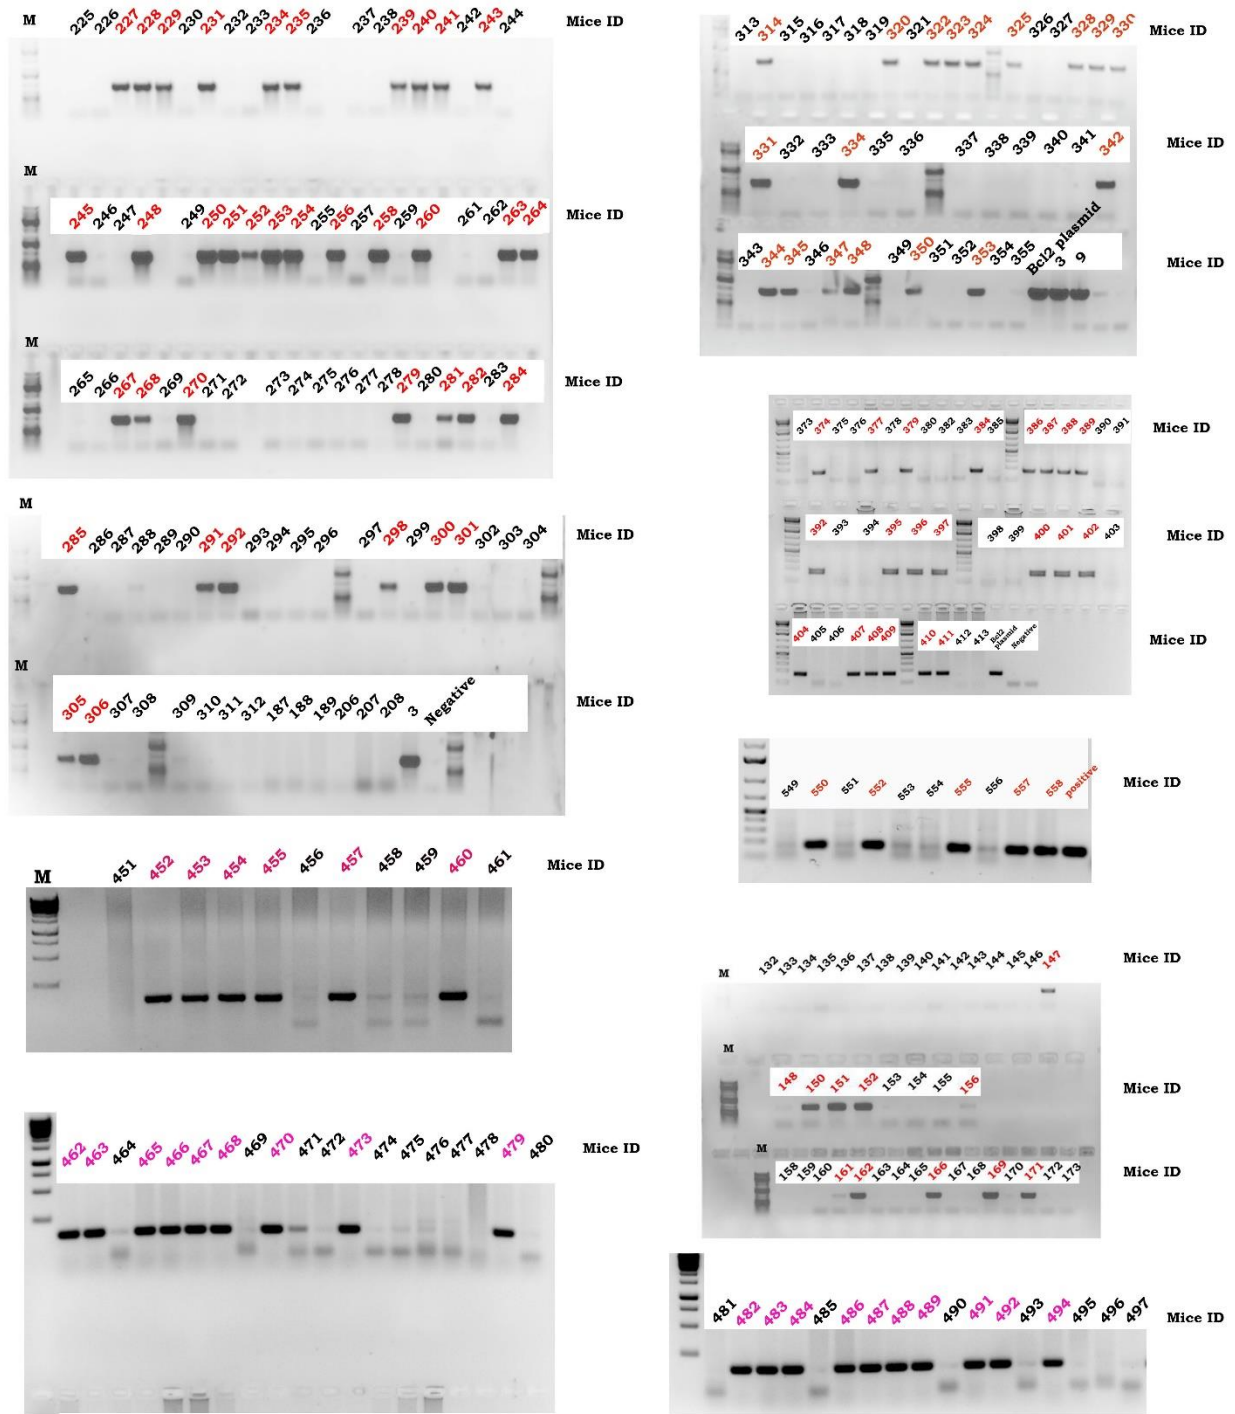

**Supplementary Figure 2.** Genotyping of Bcl2 transgenic mice. Representative genotyping data by PCR during breeding are shown.

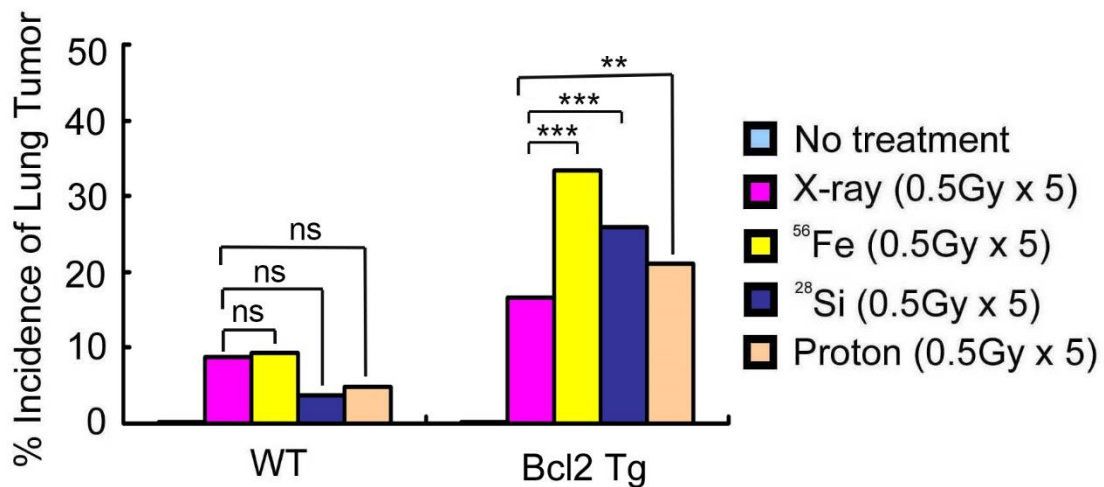

**Supplementary Figure 3.** High-LET IR induced higher incidence of lung cancer than low-LET X-ray IR in lung-targeting Bcl2 transgenic mice. Wild type C57BL/6 mice and lung-targeting Bcl2 transgenic mice were exposed to 0.5 Gy of X-ray, <sup>56</sup>Fe, <sup>28</sup>Si or proton once a day for 5 days continuously, followed by monitoring lung tumorigenesis for 18 months. Percentage of lung cancer incidence was calculated for all groups. Number of mice (n) for each group is indicated in Table 2, \*\* $P < 0.01$ , \*\*\* $P < 0.001$ , ns→ no significance, by 2-tailed  $t$  test.

**Supplementary Table 1.** Description of Radiation Quality

| Radiation Type              | Energy    | Dose (Gy) | Dose Rate (Gy/min) |
|-----------------------------|-----------|-----------|--------------------|
| X-ray                       | 320KV     | 0.5x5     | 0.5                |
| Iron ( <sup>56</sup> Fe)    | 600 MeV/u | 0.5x5     | 0.5                |
| Silicon ( <sup>28</sup> Si) | 300 MeV/u | 0.5x5     | 0.5                |
| Proton                      | 150 MeV/u | 0.5x5     | 0.5                |

**Supplementary Table 2.** Incidence of Lung Tumorigenesis

|                            | Radiation Type              | Mouse No.<br>(Lung Tumor /<br>Total, %) | Tumor Diagnosis   |
|----------------------------|-----------------------------|-----------------------------------------|-------------------|
| Wild type<br>mice          | Ctrl                        | 0/30 (0.0%)                             | NA                |
|                            | X-ray                       | 3/34 (8.82%)                            | ADC (3)           |
|                            | Iron ( <sup>56</sup> Fe)    | 5/54 (9.26%)                            | ADC (3); SCC (2)  |
|                            | Silicon ( <sup>28</sup> Si) | 2/53 (3.77%)                            | ADC (2)           |
|                            | Proton                      | 2/42 (4.76%)                            | ADC (2)           |
| Bcl2<br>transgenic<br>mice | Ctrl                        | 0/30 (0.0%)                             | NA                |
|                            | X-ray                       | 5/30 (16.67%)                           | ADC (5)           |
|                            | Iron ( <sup>56</sup> Fe)    | 17/51 (33.33%)                          | ADC (14); SCC (3) |
|                            | Silicon ( <sup>28</sup> Si) | 13/50 (26.0%)                           | ADC (13)          |
|                            | Proton                      | 11/52 (21.15%)                          | ADC (11)          |

NA: Not Applicable

ADC: Adenocarcinoma

SCC: Squamous Cell Carcinoma

Figure 1b

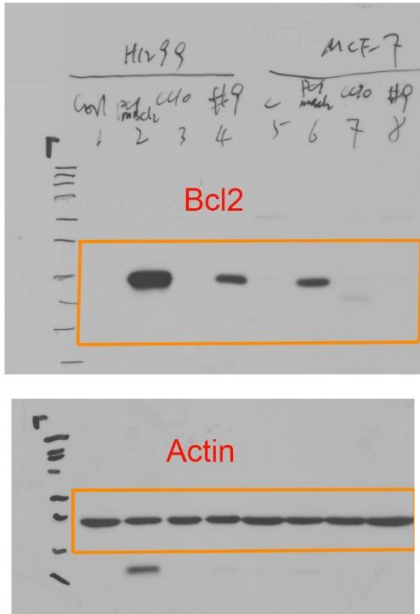

Figure 2a

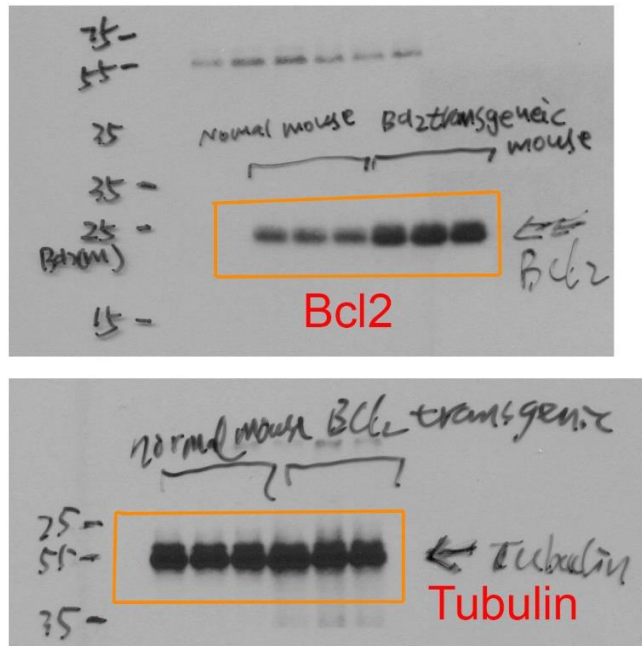

Figure 3a

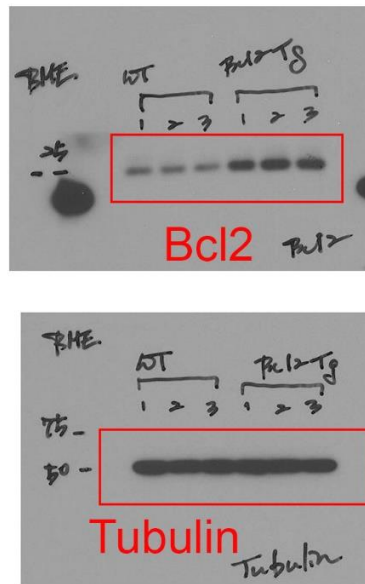

Supplementary Figure 4. (Related to Figure 1b, 2a and 3a)

Original unedited Western blots
